# Supplementary material for: Origin and Spread of Bos taurus: New Clues from Mitochondrial Genomes Belonging to Haplogroup T1
Source: PLoS One. 2012 Jun 7;7(6):e38601. doi: 10.1371/journal.pone.0038601 (PMC3369859; doi:10.1371/journal.pone.0038601)
Supplement: Table S4 — Comparison of dideoxy vs Illumina sequencing results for samples CINL14 (#31) and CIN11 (#15). (XLS) [file pone.0038601.s004.xls]

## Sheet: Foglio1
Table S4. Comparison of dideoxy vs Illumina sequencing results for samples CINL14 (#31) and CIN11 (#15)
		dideoxysequencing	Illumina Sequencing
BRS nucleotide position	BRSa sequence	CINL14	CINL14 Variant	Coverage	Variant Count	Variant Frequency
587.1b	-	C	C	332	287	86.4
2536	C	A	A	83	83	100
3208	T	C	C	162	147	90.7407
7542	G	A	A	221	208	94.1176
9682	G	C	C	214	214	100
13310	A	C	C	191	190	99.4764
15147	T	C	C	234	205	87.6068
15326	G	A	A	298	245	82.2148
16022	G	A	A	194	164	84.5361
16050	C	T	T	239	214	89.5397
16113	T	C	C	283	266	93.9929
16255	T	C	C	219	219	100
BRS nucleotide position	BRSa sequence	CIN11	CIN11 Variant	Coverage	Variant Count	Variant Frequency
8	G	A	A	4518	4266	94.4
169	A	G	G	21607	21546	99.7
221.1c	-	C	C	14218	10154	71.4
587.1b	-	C	C	7361	6170	83.8
1298	G	A	A	8943	8591	96.1
2055.1d	-	C	C	21171	17152	81
2536	C	A	A	5038	5029	99.8
4740	G	A	A	5807	5453	93.9
7320	C	T	T	5584	5276	94.5
9602	G	A	A	6449	6116	94.8
9682	G	C	C	6666	6661	99.9
13310	A	C	C	9189	9177	99.9
16050	C	T	T	8633	8065	93.4
16113	T	C	C	7993	7445	93.1
16119	T	C	C	7637	6941	90.9
16167	C	T	T	8659	7903	91.3
16255	T	C	C	6770	6765	99.9
a Sequencing reads produced by dideoxysequencing and Illumina sequencing were aligned to the BRS using
Sequencer (vs 5.9, Gene Codes) and CLC Genomic Workbench (vs.5.1, CLC Bio ), respectively.
b Denotes the presence of the insertion of a C at nucleotide position 587.
c Denotes the presence of the insertion of a C at nucleotide position 221.
d Denotes the presence of the insertion of a C at nucleotide position 2055.
